# **MetaSanity: An integrated, customizable microbial genome evaluation and annotation pipeline**

1  
2  
3  
4  
5  
6  
7  
8  
9  
10

Christopher J Neely<sup>1#</sup>, Elaina D Graham<sup>1</sup>, Benjamin J Tully<sup>1,2#</sup>

<sup>1</sup> Department of Biological Sciences, University of Southern California, Los Angeles, CA 90089, USA

<sup>2</sup> Center for Dark Energy Biospheres Investigations, University of Southern California, Los Angeles, CA 90089, USA

# corresponding author(s)

## 11 **Abstract**

## 12 **Summary**

13 As the importance of microbiome research continues to become more prevalent and essential to  
14 understanding a wide variety of ecosystems (e.g., marine, built, host-associated, etc.), there is a  
15 need for researchers to be able to perform highly reproducible and quality analysis of microbial  
16 genomes. MetaSanity incorporates analyses from eleven existing and widely used genome  
17 evaluation and annotation suites into a single, distributable workflow, thereby decreasing the  
18 workload of microbiologists by allowing for a flexible, expansive data analysis pipeline.  
19 MetaSanity has been designed to provide separate, reproducible workflows, that (1) can  
20 determine the overall quality of a microbial genome, while providing a putative phylogenetic  
21 assignment, and (2) can assign structural and functional gene annotations with varying degrees of  
22 specificity to suit the needs of the researcher. The software suite combines the results from  
23 several tools to provide broad insights into overall metabolic function and putative extracellular  
24 localization of peptidases and carbohydrate-active enzymes. Importantly, this software provides  
25 built-in optimization for “big data” analysis by storing all relevant outputs in an SQL database,  
26 allowing users to query all the results for the elements that will most impact their research.

## 27 **Availability and implementation**

28 MetaSanity is provided under the GNU General Public License v.3.0 and is available for  
29 download at <https://github.com/cjneely10/MetaSanity>. This application is distributed as a Docker  
30 image. MetaSanity is implemented in Python3/Cython and C++.

## 31 **Supplementary information**

32 Supplementary data are available below.

## 33 **1 Introduction**

34 The analysis of microbial genomes has become an increasingly common task for many fields of  
35 biology and geochemistry. Researchers can routinely generate hundreds/thousands of  
36 environmentally derived microbial genomes using methodologies such as metagenomics (Tully  
37 et al., 2018), high-throughput culturing (Thrash et al., 2015), and single cell sorting  
38 (Stepanauskas et al., 2017). However, analyzing the data can be problematic, as data analysis is

39 computationally intensive and requires a knowledge of software that is constantly changing and  
40 may be difficult to install or execute. For the average researcher, the task of evaluating and  
41 annotating a set of microbial genomes may be time intensive and computationally rigorous.  
42 Here, we present MetaSanity, a comprehensive and customizable solution for generating  
43 evaluation and annotation pipelines for bacterial and archaeal isolate genomes, metagenome-  
44 assembled genomes (MAGs), and single-amplified genomes (SAGs). MetaSanity provides  
45 genome quality evaluation, phylogenetic assignment, as well as structural and functional  
46 annotation through a variety of integrated programs based on the procedure described in ref.  
47 Tully (2019). MetaSanity provides a workflow that combines all outputs into a single queryable  
48 database that operates easily from the command line. Installation can be performed at the user  
49 level, limiting the need for intervention by system administrators, and, except for certain memory  
50 intensive programs, can be run locally on high-end personal computers.

## 51 **2 Description of Methods**

52 MetaSanity consists of two smaller workflows (Figure 1): (1) PhyloSanity, to evaluate the  
53 completion, contamination, redundancy, and phylogeny of each genome in a dataset, and (2)  
54 FuncSanity, to provide structural and functional annotations of each genome. Each component  
55 consists of several optional applications that can be customized to specific research needs. While  
56 each component contained within the two pipelines runs independently and generates component  
57 specific outputs, MetaSanity combines all outputs into a single queryable SQL database that  
58 allows fast and easy retrieval of data – in this case, gene annotations and other related genomic  
59 data. MetaSanity focuses on allowing users the ability to fine-tune and customize their data  
60 analysis pipelines with minimal effort and maximized computational and storage efficiency  
61 (Supplemental Table 1). MetaSanity is distributed as a Docker image (Merkel et al., 2014) and is  
62 implemented using a combination of Python3 (Python Software Foundation 2014) /Cython  
63 (Bradshaw et al., 2011) and C++ (ISO/IEC 2014).

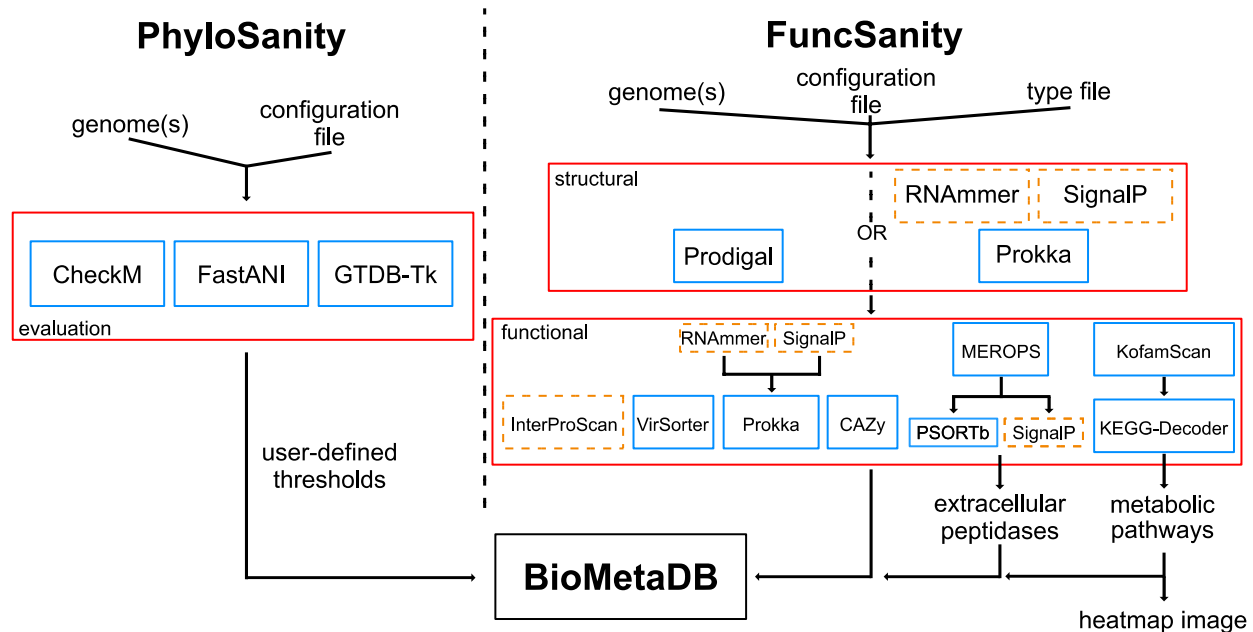

64

65 **Figure 1** MetaSanity pipeline schema. Programs and databases that are part of the MetaSanity  
 66 installation are in blue boxes. Programs in the dotted orange boxes must be installed separately  
 67 by the user due to licensing agreements.

## 68 2.1 PhyloSanity

69 PhyloSanity is designed to provide metrics of genome quality and to filter genomes for  
 70 downstream analysis based on user defined quality metrics. The workflow integrates CheckM  
 71 v1.0.18 (Parks et al., 2015), GTDB-Tk v.0.3.2 (Parks et al., 2018), and FastANI (Jain et al.,  
 72 2019) as part of its evaluation pipeline. CheckM estimates the completion and contamination of  
 73 each genome (Parks et al., 2015). Next, FastANI compares each genome in a pairwise fashion  
 74 against all other genomes to determine the average nucleotide identify (ANI) for each genome  
 75 pair (Jain et al., 2019). For any set of genomes that shares an ANI above a user-defined value, a  
 76 non-redundant genome representative will be selected from the set that is the most complete and  
 77 least contaminated. This allows users the option to exclude redundant genomes from further  
 78 analysis. Differentiating genomes as non-redundant versus redundant can be useful for  
 79 researchers working with MAGs or SAGs that are generated from replicate samples and may not  
 80 have biological meaning when working with isolates or strain level differences. All genomes can  
 81 undergo phylogenetic assignment based on relative evolutionary distance (Parks et al., 2018)  
 82 through GTDB-Tk, which will replace the CheckM-returned taxonomic assignment.

## 83 **2.2 FuncSanity**

84 FuncSanity provides structural and functional annotation of microbial genomes. The workflow  
85 incorporates annotation suites from eight existing and widely used programs. The use of multiple  
86 annotation programs has the advantage of capturing functional predictions that may not have  
87 been detected due to database or search limitations. Specialized annotation programs, such as  
88 VirSorter (Roux et al., 2015), use custom tools and/or databases to return relevant annotations  
89 that are not captured by other programs in MetaSanity. Open reading frames (ORFs) are  
90 predicted using Prodigal v2.6.3 (Hyatt et al., 2010); however, users may opt to use the putative  
91 coding DNA sequences (CDS) generated by Prokka v1.13.3 (Seeman, 2014). From here, putative  
92 ORFs are processed by a set of annotation tools that can be selected by the user with user-  
93 defined filtering and cutoff values.

### 94 ***Kyoto Encyclopedia of Genes and Genomes (KEGG) Annotation***

95 Putative ORFs can be searched against the KofamKOALA database using KofamScan v.1.1.0  
96 (Aramaki et al., 2019). Default parameters are used and the ‘mapper’ tab-delimited output option  
97 is generated, linking ORF IDs to KEGG Ontology (KO) IDs. Users can query any KO ID to  
98 generate specific functional search results in BioMetaDB.

### 99 ***KEGG-Decoder***

100 KEGG annotations can be used to estimate the completeness of various biogeochemically-  
101 relevant metabolic pathways in a genome using KEGG-Decoder v.1.0.1 (Graham et al., 2018;  
102 <https://github.com/bjtully/BioData/tree/master/KEGGDecoder>). Users can search genomes based  
103 on completeness of a pathway or function of interest. An additional heatmap summary  
104 visualization is generated.

### 105 ***VirSorter***

106 VirSorter v1.0.5 (Roux et al., 2015) can be implemented to identify phage and prophage  
107 signatures in each genome using default parameters. Users can search for matches to each of the  
108 phage and prophage categories returned by VirSorter and generate lists of contigs and/or  
109 genomes with the assignments (Supplementary Table 1).

### 110 ***InterProScan***

111 InterProScan 5.36-75.0 (Jones et al., 2019) is an optional installation and can be used for domain  
112 prediction on putative ORFs. Users have the option of downloading all of the InterProScan  
113 databases, including TIGRFam (Haft et al., 2003), Pfam (Finn et al., 2016), CDD (Marchler-  
114 Bauer et al., 2017), and PANTHER (Mi et al., 2019). Each InterProScan database result is  
115 indexed separately in BioMetaDB and can be used to return matching genomes using database  
116 specific IDs (e.g., PF01036 would return putative rhodopsin ORFs from a Pfam result).

### 117 *Prokka Annotation*

118 If not chosen as the option for structural annotation, genomes can be annotated using Prokka and  
119 its associated databases with the parameters --addgenes (adds the “gene” feature to each CDS in  
120 the GenBank output format), --addmrna (adds the “mRNA” feature to each CDS in the GenBank  
121 output format), --usegenus (use the genus-specific databases), --metagenome (improve gene  
122 predictions for fragmented genomes), and --rnammer (sets RNAmmer as the preferred rRNA  
123 prediction tool). rRNA identification with RNAmmer v.1.2 (Lagesen et al., 2007) and signal  
124 peptide detection with SignalP v.4.1 (Nielson, 2017) are optional installations.

### 125 *Carbohydrate-active enzyme (CAZy) Annotation*

126 Putative ORFs can be assigned a putative CAZy functionality (Cantarel et al., 2009) based on the  
127 dbCANv2 database (Zhang et al., 2018). ORFs are searched against dbCANv2 using HMMER  
128 v3.1b2 (Eddy, 2011) with the minimum score threshold set to 75 (-T parameter). PSORTb v.3.0  
129 (Yu et al., 2010) and SignalP can be optionally performed on CAZy matches to determine if a  
130 putative enzyme is predicted to be extracellular. An extracellular assignment is made if PSORTb  
131 predicts “extracellular” or “outer membrane” localization or if PSORTb returns “unknown”  
132 localization and SignalP predicts the presence of a signal peptide. Users can search for genes and  
133 genomes based on overall CAZy annotations or by searching for specific designations (e.g.,  
134 GT41 for glycosyl transferase family 41).

### 135 *Peptidase Annotation*

136 Putative ORFs can be assigned to a peptidase family using a set of HMMs that represent the  
137 MEROPS database (Rawlings et al., 2013). The putative extracellular nature of a MEROPS  
138 match can be determined as above. Users can search for genes and genomes based on overall  
139 MEROPS annotations or by searching specific peptidase families.

140 InterProScan, SignalP, and RNAmmer are not automatically distributed with MetaSanity and  
141 require users to download their binaries separately and agree to their individual license  
142 requirements.

### 143 **2.3 BioMetaDB**

144 BioMetaDB is a specialized relational database management system project that integrates  
145 modularized storage and retrieval of FASTA records with the metadata describing them. This  
146 application uses tab-delimited data files to generate table relation schemas via Python3. Based on  
147 SQLAlchemy v.1.3.7 (Bayer, 2012), BioMetaDB allows researchers to efficiently manage data  
148 from the command line by providing operations that include: (1) the ability to store information  
149 from any valid tab-delimited data file and to quickly retrieve FASTA records or annotations  
150 related to these datasets by using SQL-optimized command-line queries; and, (2) the ability to  
151 run all CRUD operations (create, read, update, delete) from the command line and from python  
152 scripts. Output from both workflows is stored into a BioMetaDB project, providing users a  
153 simple interface to comprehensively examine their data (Supplemental Table 2). Users can query  
154 application results used across the entire genome set for specific information that is relevant to  
155 their research, allowing the potential to screen genomes based on returned taxonomy, quality,  
156 annotation, putative metabolic function, or any combination thereof.

### 157 **3 Results**

158 MetaSanity was tested on two separate systems – a personal computer with an Intel core i5-4570  
159 CPU @ 3.20 GHz processor with 4 cores and 32 GB of RAM operating the Deepin 15.11 Linux  
160 distribution, and an academic server with an Intel Xeon E7-4850 v2 @ 2.30 GHz processor with  
161 96 cores and 1 TB of RAM operating the Ubuntu 18.04.3 LTS Linux distribution. Reduced options  
162 were calculated on the personal computer using all four available threads and preset parameter  
163 flags that skip memory intensive processes. Complete options were calculated on the academic  
164 server using 10 threads and no parameters to reduce memory usage. Runtime results are available  
165 in Supplemental Table 3. The current architecture relies on sequential completion of time intensive  
166 processes, several of which are optional for users. Ongoing modifications that take advantage of  
167 parallelizing these processes should decrease the overall computation time.

168

| Workflow    | Calling Program | Available Flags                                                                                                  |
|-------------|-----------------|------------------------------------------------------------------------------------------------------------------|
| PhyloSanity | CheckM          | --aai_strain<br>-t<br>--pplacer_threads<br>--unique<br>--e_value<br>--length<br>--reduced_tree<br>--force_domain |
|             | FastANI         | --fragLen<br>--kmer<br>--threads<br>--minFrag                                                                    |
|             | GTDB-Tk         | --cpus<br>--min_perc_aa                                                                                          |
| FuncSanity  | Prodigal        | -p<br>-m<br>-c                                                                                                   |
|             | HMMSearch       | -T<br>--cpu                                                                                                      |
|             | Diamond         | --threads                                                                                                        |
|             | PSORTb          | --cutoff<br>--divergent<br>-M<br>-c                                                                              |



|  |              |                                                                                                                                              |
|--|--------------|----------------------------------------------------------------------------------------------------------------------------------------------|
|  | Kofamscan    | --cpu                                                                                                                                        |
|  | Prokka       | --addgenes, --addmra,<br>--usegenus, --metagenome,<br>--rnammer, --force<br>--evaluate, --cpus<br>--mincontiglen, --norrna, --notrna, --rfam |
|  | InterProScan | --applications<br>--cpu<br>--minsize<br>--goterms, --iprlookup<br>--pathways                                                                 |
|  | VirSorter    | --db<br>--ncpu<br>--virome<br>--diamond                                                                                                      |

170 **Supplementary Table 1.** Parameters flags available to each program within the MetaSanity  
 171 workflows. Modification to the configuration files will allow users may include any set of these  
 172 flags for specific analyses.

| Workflow    | Name of table generated | Database table information |                                                           |
|-------------|-------------------------|----------------------------|-----------------------------------------------------------|
|             |                         | Program                    | Searchable fields                                         |
| PhyloSanity | "evaluation"            | CheckM                     | completion<br>contamination<br>domain                     |
|             |                         | FastANI                    | redundant_copies                                          |
|             |                         | GTDB-Tk                    | domain, phylum, _class, _order,<br>family, genus, species |
|             |                         | Added                      | is_complete<br>is_contaminated                            |

|                   |             |                    |                                                                                              |
|-------------------|-------------|--------------------|----------------------------------------------------------------------------------------------|
|                   |             |                    | is_nonredundant                                                                              |
| <b>FuncSanity</b> | “genome-id” | Prokka             | prokka                                                                                       |
|                   |             | VirSorter          | phage_contig_1<br>phage_contig_2<br>phage_contig_3<br>prophage_1<br>prophage_2<br>prophage_3 |
|                   |             | Kofamscan          | ko                                                                                           |
|                   |             | CAZy               | cazy                                                                                         |
|                   |             | MEROPS             | merops_pfam                                                                                  |
|                   |             | PSORTb/<br>SignalP | is_extracellular                                                                             |
|                   |             | InterProScan       | cdd, hamap, panther, pfam, prodom, sfld, smart, superfamily, tigrfam                         |
|                   | “functions” | Peptidase          | <MEROPS and CAZy designations>                                                               |
|                   |             | KEGG-Decoder       | <Metabolic/functional pathways>                                                              |

173 **Supplementary Table 2.** Underlying database structure and queryable objects from the  
174 complete MetaSanity workflow.

175

|                   | <b>PhyloSanity</b>                    |                        | <b>FuncSanity</b>                             |                        |
|-------------------|---------------------------------------|------------------------|-----------------------------------------------|------------------------|
|                   | No GTDB-Tk;<br>CheckM<br>reduced_tree | Complete<br>evaluation | Recommended<br>& optional; no<br>InterProScan | Complete<br>annotation |
| <b>1 genome</b>   | 0.05 hr                               | 0.63 hr                | 0.52 hr                                       | 1.62 hr                |
| <b>10 genomes</b> | 0.15 hr                               | 1.02 hr                | 6.17 hr                                       | 20.3 hr                |

176 **Supplemental Table 3.** Runtimes of each core component of the MetaSanity pipeline.

177 InterProScan search ran using the databases TIGRFAM, SFLD, SMART, SUPERFAMILY,  
178 Pfam, ProDom, Hamap, CDD, and PANTHER, with parameter flags --goterms, --iprlookup, and  
179 --pathways.

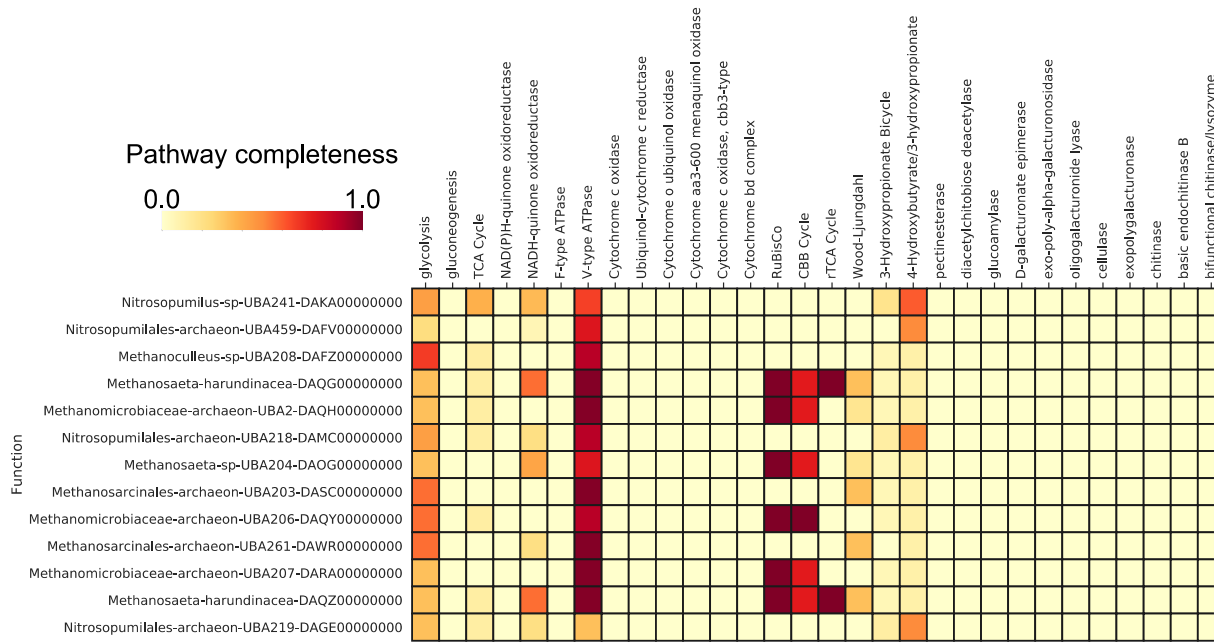

180

181 **Supplemental Figure 1.** Example KEGG-Decoder heatmap output. The completeness of various  
 182 biogeochemically-relevant pathways for a collection of marine metagenome-assembled  
 183 genomes, scaled from 0.0-1.0.

## 184 Acknowledgements

185 We would like to thank Taylor Reiter, Roth Conrad, Jay Osvatic, and Luiz Irber for providing  
 186 code contributions to KEGG-Decoder as part of the Moore Foundation funded 'Speeding Up  
 187 Science' hackathon. This is C-DEBI Contribution XXX.

## 188 Funding

189 This work was supported by the National Science Foundation Science and Technology Center,  
 190 the Center for Dark Energy Biosphere Investigations (C-DEBI) [OCE- 0939654 to B.J.T.].  
 191 C.J.N. was supported by the University of Southern California SOAR program.

192

193

194

## References

- 195 Aramaki T., Blanc-Mathieu R., Endo H., Ohkubo K., Kanehisa M., Goto S., Ogata H. (2019). KofamKOALA:  
196 KEGG ortholog assignment based on profile HMM and adaptive score threshold. *bioRxiv* doi:  
197 <https://doi.org/10.1101/602110>.
- 198 Bayer, M. (2012). SQLAlchemy. In Amy Brown and Greg Wilson, editors, “The Architecture of Open Source  
199 Applications Volume II: Structure, Scale, and a Few More Fearless Hacks.” <http://aosabook.org>.
- 200 Bradshaw, R., Behnel S., Seljebotn D.S., Ewing, G., et al. (2011). The Cython compiler. <http://cython.org>.
- 201 Buchfink B., Xie C., Huson D. H. (2015). Fast and sensitive protein alignment using DIAMOND. *Nature Methods*  
202 *12*, 59-60. doi:10.1038/nmeth.3176.
- 203 Camacho C., Coulouris G., Avagyan V., Ma N., Papadopoulos J., Bealer K., & Madden T.L. (2008) "BLAST+:  
204 architecture and applications." *BMC Bioinformatics* 10:421  
205 <https://bmcbioinformatics.biomedcentral.com/articles/10.1186/1471-2105-10-421>.
- 206 Cantarel, B. L., Coutinho, P. M., Rancurel, C., Bernard, T., Lombard, V., & Henrissat, B. (2009). The Carbohydrate-  
207 Active EnZymes database (CAZy): an expert resource for Glycogenomics. *Nucleic Acids Research*, *37(Database)*,  
208 D233–D238. <http://doi.org/10.1093/nar/gkn663>.
- 209 Eddy S.R. (2011) Accelerated Profile HMM Searches. *PLoS Comput Biol* *7(10)*: e1002195.  
210 <https://doi.org/10.1371/journal.pcbi.1002195>.
- 211 Finn, R. D., Coggill, P., Eberhardt, R. Y., Eddy, S. R., Mistry, J., Mitchell, A. L., et al. (2016). The Pfam protein  
212 families database: towards a more sustainable future. *Nucleic Acids Research*, *44(D1)*, D279–D285.  
213 <http://doi.org/10.1093/nar/gkv1344>.
- 214 Graham E. D., Heidelberg J. F., Tully B. J. (2018) Potential for primary productivity in a globally-distributed  
215 bacterial phototroph. *ISME J* *350*, 1–6.
- 216 Haft, D. H., Selengut, J. D., & White, O. (2003). The TIGRFAMs database of protein families. *Nucleic Acids*  
217 *Research*, *31(1)*, 371–373. <http://doi.org/10.1093/nar/gkg128>.
- 218 Hyatt, D., Chen, G. L., Locascio, P. F., Land, M. L., Larimer, F. W., & Hauser, L. J. (2010). Prodigal: prokaryotic  
219 gene recognition and translation initiation site identification. *BMC bioinformatics*, *11*, 119. doi:10.1186/1471-2105-  
220 11-119.
- 221 ISO/IEC. (2014). ISO International Standard ISO/IEC 14882:2014(E) – Programming Language C++. [Working  
222 draft]. Geneva, Switzerland: International Organization for Standardization (ISO). Retrieved from  
223 <https://isocpp.org/std/the-standard>.
- 224 Jain C., et al. 2019. High-throughput ANI Analysis of 90K Prokaryotic Genomes Reveals Clear Species Boundaries.  
225 *Nature Communications*, doi: 10.1038/s41467-018-07641-9.
- 226 Jones, P., Binns, D., Chang, H. Y., Fraser, M., Li, W., McAnulla, C., ... Hunter, S. (2014). InterProScan 5: genome-  
227 scale protein function classification. *Bioinformatics (Oxford, England)*, *30(9)*, 1236–1240.  
228 doi:10.1093/bioinformatics/btu031.
- 229 Lagesen, K., Hallin, P., Rødland, E. A., Staerfeldt, H. H., Rognes, T., & Ussery, D. W. (2007). RNAmmer:  
230 consistent and rapid annotation of ribosomal RNA genes. *Nucleic acids research*, *35(9)*, 3100–3108.  
231 doi:10.1093/nar/gkm160.
- 232 Marchler-Bauer A., Bo Y., Han L., He J., Lanczycki C. J., Lu S., Chitsaz F., Derbyshire M. K., Geer R. C.,  
233 Gonzales N. R., Gwadz M., Hurwitz D. I., Lu F., Marchler G. H., Song J. S., Thanki N., Wang Z., Yamashita R. A.,

- 234 Matsen F. A., Kodner R. B., Armbrust E. V. (2010). pplacer: linear time maximum-likelihood and Bayesian  
235 phylogenetic placement of sequences onto a fixed reference tree. *BMC Bioinformatics 11*: doi:10.1186/1471-2105-  
236 11-538.
- 237 Merkel, D. (2014). Docker: Lightweight Linux Containers for Consistent Development and Deployment. *Linux J.*
- 238 Mi, H., Muruganujan, A., Huang, X., Ebert, D., Mills, C., Guo, X., & Thomas, P. D. (2019). Protocol Update for  
239 large-scale genome and gene function analysis with the PANTHER classification system (v.14.0). *Nature Protocols*,  
240 1–21. <http://doi.org/10.1038/s41596-019-0128-8>.
- 241 Nielsen H. (2017) Predicting Secretory Proteins with SignalP. In: Kihara D. (eds) *Protein Function Prediction.*  
242 *Methods in Molecular Biology, vol 1611.* Humana Press, New York, NY.
- 243 Parks, D. H., Chuvochina, M., Waite, D. W., Rinke, C., Skarshewski, A., Chaumeil, P.-A., & Hugenholtz, P. (2018).  
244 A standardized bacterial taxonomy based on genome phylogeny substantially revises the tree of life. *Nature*  
245 *Biotechnology, 15*, 1–14. <http://doi.org/10.1038/nbt.4229>.
- 246 Parks, D. H., Imelfort M., Skennerton C. T., Hugenholtz P., Tyson G. W. (2015). CheckM: assessing the quality of  
247 microbial genomes recovered from isolates, single cells, and metagenomes. *Genome Research, 25*: 1043–1055.
- 248 Python Software Foundation. Python Language Reference, version 3. <http://www.python.org>
- 249 Rawlings, N. D., Waller, M., Barrett, A. J., & Bateman, A. (2013). MEROPS: the database of proteolytic enzymes,  
250 their substrates and inhibitors. *Nucleic Acids Research, 42(D1)*, D503–D509. <http://doi.org/10.1093/nar/gkt953>.
- 251 Roux, S., Enault, F., Hurwitz, B. L., & Sullivan, M. B. (2015). VirSorter: mining viral signal from microbial  
252 genomic data. *PeerJ, 3*, e985. <https://doi.org/10.7717/peerj.985>.
- 253 Seemann T. (2014). Prokka: rapid prokaryotic genome annotation. *Bioinformatics 30(14)*, 2068-9. PMID:24642063.
- 254 Stepanauskas, R., Fergusson, E. A., Brown, J., Poulton, N. J., Ben Tupper, Labonté, J. M., et al. (2017). Improved  
255 genome recovery and integrated cell-size analyses of individual uncultured microbial cells and viral particles.  
256 *Nature Communications, 8(1)*, 1–10. <http://doi.org/10.1038/s41467-017-00128-z>.
- 257 Thrash, J. C., Weckhorst, J. L., & Pitre, D. M. (2015). Cultivating Fastidious Microbes. In *Hydrocarbon and Lipid*  
258 *Microbiology Protocols* (Vol. 39, pp. 57–78). Berlin, Heidelberg: Springer Berlin Heidelberg.  
259 [http://doi.org/10.1007/8623\\_2015\\_67](http://doi.org/10.1007/8623_2015_67).
- 260 Tully, B. J. (2019). Metabolic diversity within the globally abundant Marine Group II Euryarchaea offers insight  
261 into ecological patterns. *Nature Communications, 10(1)*, 1–12. <http://doi.org/10.1038/s41467-018-07840-4>.
- 262 Tully, B. J., Graham, E. D., & Heidelberg, J. F. (2018). The reconstruction of 2,631 draft metagenome-assembled  
263 genomes from the global oceans. *Scientific Data, 5*, 170203. <http://doi.org/10.1038/sdata.2017.203>.
- 264 Yu, N. Y., Wagner, J. R., Laird, M. R., Melli, G., Rey, S., Lo, R., Dao, P., Sahinalp, S. C., Ester, M., Foster, L.J.,  
265 and Brinkman, F. S. L. (2010). PSORTb 3.0: improved protein subcellular localization prediction with refined  
266 localization subcategories and predictive capabilities for all prokaryotes. *Bioinformatics 26(13)*:1608-1615.
- 267 Zhang D., Zheng C., Geer L. Y., Bryant S. H. (2017). CDD/SPARCLE: functional classification of proteins via  
268 subfamily domain architectures. *Nucleic Acids Research 45(D1)*: D200-D203. doi: 10.1093/nar/gkw1129.
- 269 Zhang, H., Yohe, T., Huang, L., Entwistle, S., Wu, P., Yang, Z., et al. (2018). dbCAN2: a meta server for automated  
270 carbohydrate-active enzyme annotation. *Nucleic Acids Research, 46(W1)*, W95–W101.  
271 <http://doi.org/10.1093/nar/gky418>.
